# Supplementary material for: Pan-cortical cellular imaging in freely behaving mice using a miniaturized micro-camera array microscope (mini-MCAM)
Source: PubMed Central journal article supplement — bioRxiv. 2024 Jul 29:2024.07.04.601964. Originally published 2024 Jul 6. Preprint. [Version 2] doi: 10.1101/2024.07.04.601964 (PMC11245122; doi:10.1101/2024.07.04.601964), 2024-07-29
Supplement: NIHPP2024.07.04.601964v1-supplement-2.pdf [file NIHPP2024.07.04.601964v1-supplement-2.pdf]

## SUPPLEMENTARY FIGURE

|               | This work<br>mini-MCAM                                                                                | Zhang et al<br>Biorxiv 2023<br>SOMM                                                               | Scherrer et al<br>Nat Meth 2023<br>Kiloscope                                                       | Guo et al<br>Sci Adv 2023<br>LFOV MINISCOPE                                                         |
|---------------|-------------------------------------------------------------------------------------------------------|---------------------------------------------------------------------------------------------------|----------------------------------------------------------------------------------------------------|-----------------------------------------------------------------------------------------------------|
| Field of view | 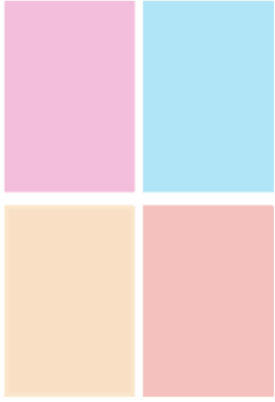<br>4x<br>4 x 2.7 mm | <br>3.6 x 3.6 mm | <br>4.8 x 3.6 mm | <br>3.6 x 2.7 mm |
| Weight        | 4.1 g                                                                                                 | 2.5 g                                                                                             | 1.4 g                                                                                              | 13.9 g                                                                                              |

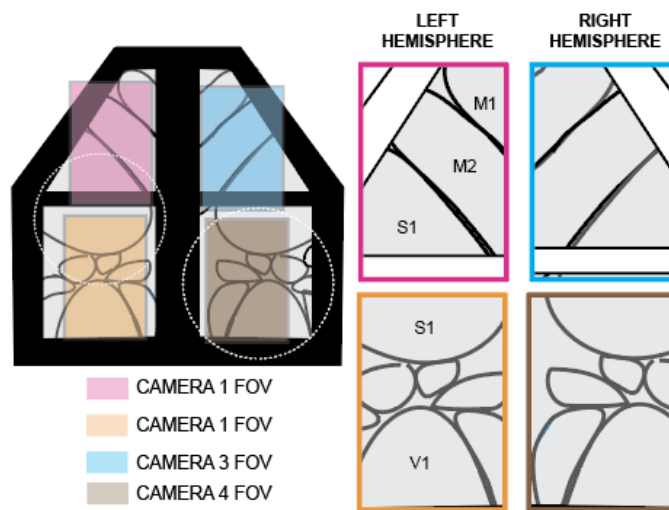

**SUPPLEMENTARY FIGURE 1:** Comparison of the mini-MCAM cumulative FOV to existing large FOV miniaturized microscopes<sup>1,2,3</sup>.

### SUPPLEMENTARY REFERENCES:

1. Zhang, Y. *et al.* A Systematically Optimized Miniaturized Mesoscope (SOMM) for large-scale calcium imaging in freely moving mice. *bioRxiv* (2024) doi:10.1101/2024.02.19.581043.

2. Scherrer, J. R., Lynch, G. F., Zhang, J. J. & Fee, M. S. An optical design enabling lightweight and large field-of-view head-mounted microscopes. *Nat. Methods* **20**, 546–549 (2023).
3. Guo, C. *et al.* Miniscope-LFOV: A large-field-of-view, single-cell-resolution, miniature microscope for wired and wire-free imaging of neural dynamics in freely behaving animals. *Sci. Adv.* **9**, eadg3918 (2023).
